# Supplementary material for: SiC3N3 monolayer as a universal anode for alkali metal-ion batteries
Source: Royal Society of Chemistry journal article supplement (doi:10.1039/d3dt01399e), 2023-01-01
Supplement: d3dt01399e1.pdf [file d3dt01399e1.pdf]

## Support Information For

# **SiC<sub>3</sub>N<sub>3</sub> Monolayer as a Universal Anode for Alkali Metal-ion Batteries**

Xiaoying Xia,<sup>a</sup> Jianze Wu,<sup>a</sup> Xu Cai,<sup>a</sup> Bao Liu,<sup>a</sup> Zhaoxin Wang,<sup>a</sup> Yongfan Zhang,<sup>a</sup>

Shuping Huang<sup>\*a,b</sup>

<sup>a</sup> College of Chemistry, Fuzhou University, Fuzhou, 350108 Fujian, China

<sup>b</sup> Fujian Provincial Key Laboratory of Electrochemical Energy Storage Materials,  
Fuzhou, 350108 Fujian, China

\*E-mail: [huangshp@gmail.com](mailto:huangshp@gmail.com)

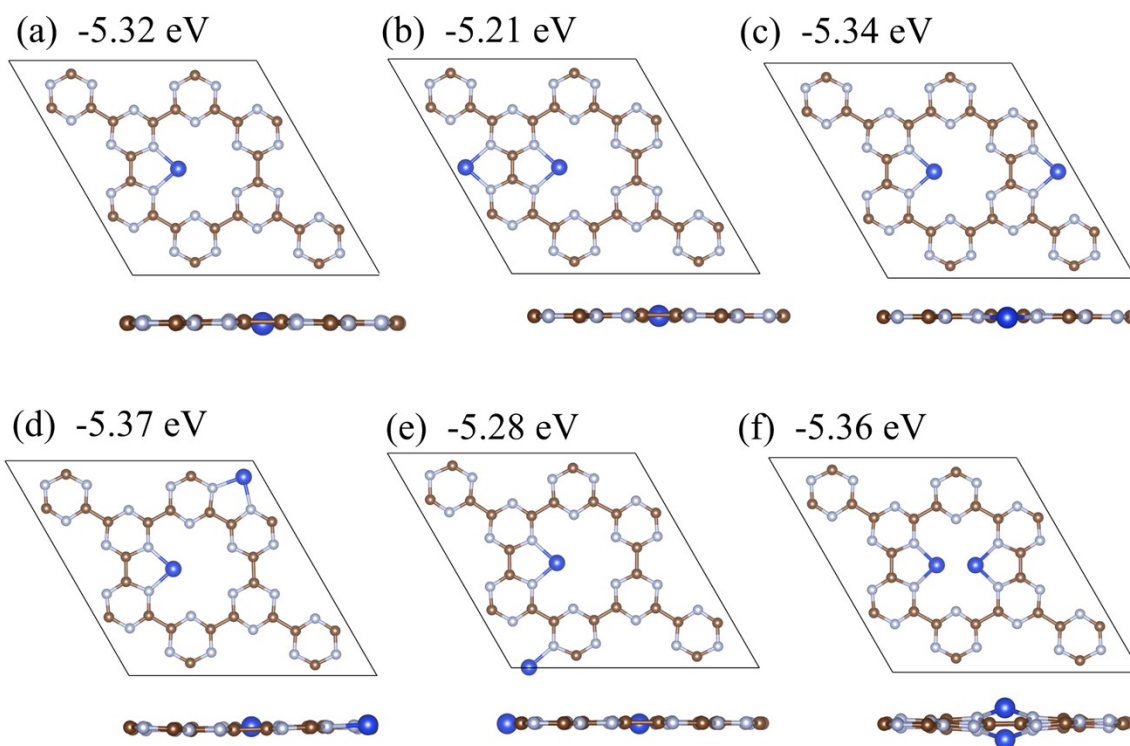

**Fig. S1** The highly symmetric configurations of (a)  $\text{SiC}_{24}\text{N}_{24}$  and (c-f)  $\text{SiC}_{12}\text{N}_{12}$  and their corresponding formation energies.

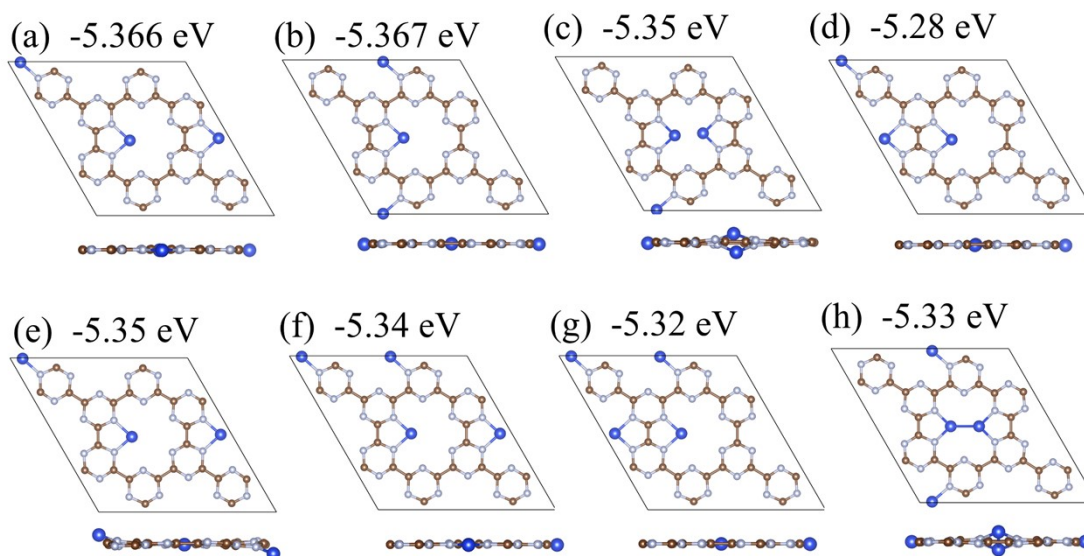

**Fig. S2** The highly symmetric configurations of (a-e)  $\text{SiC}_8\text{N}_8$  and (f-h)  $\text{SiC}_6\text{N}_6$  and their corresponding formation energies.

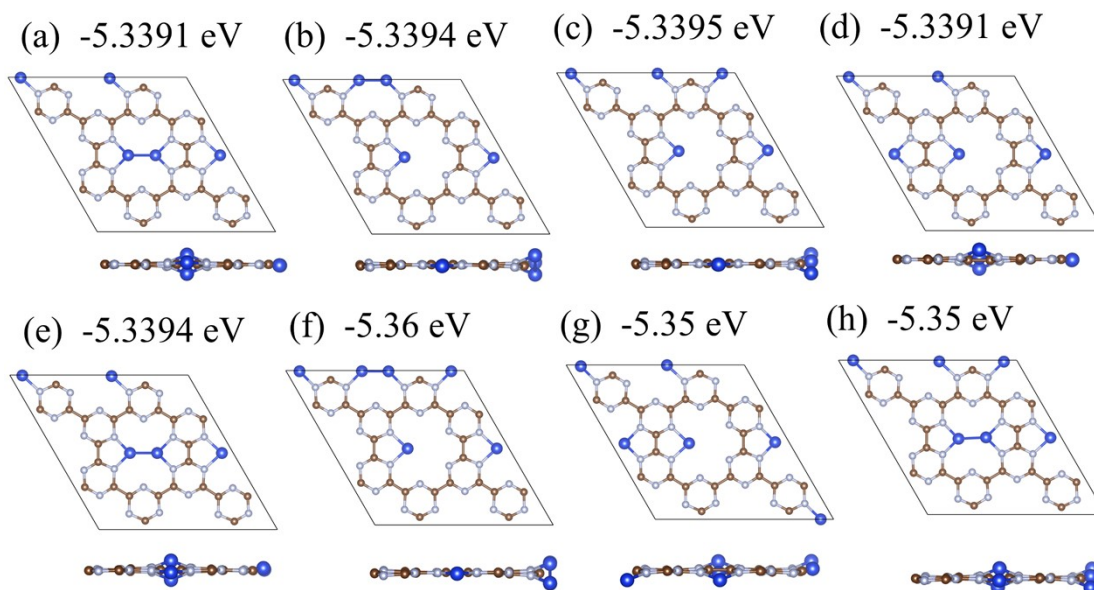

**Fig. S3** The highly symmetric configurations of (a-e)  $\text{Si}_5\text{C}_{24}\text{N}_{24}$  and (f-h)  $\text{SiC}_4\text{N}_4$  and their corresponding formation energies.

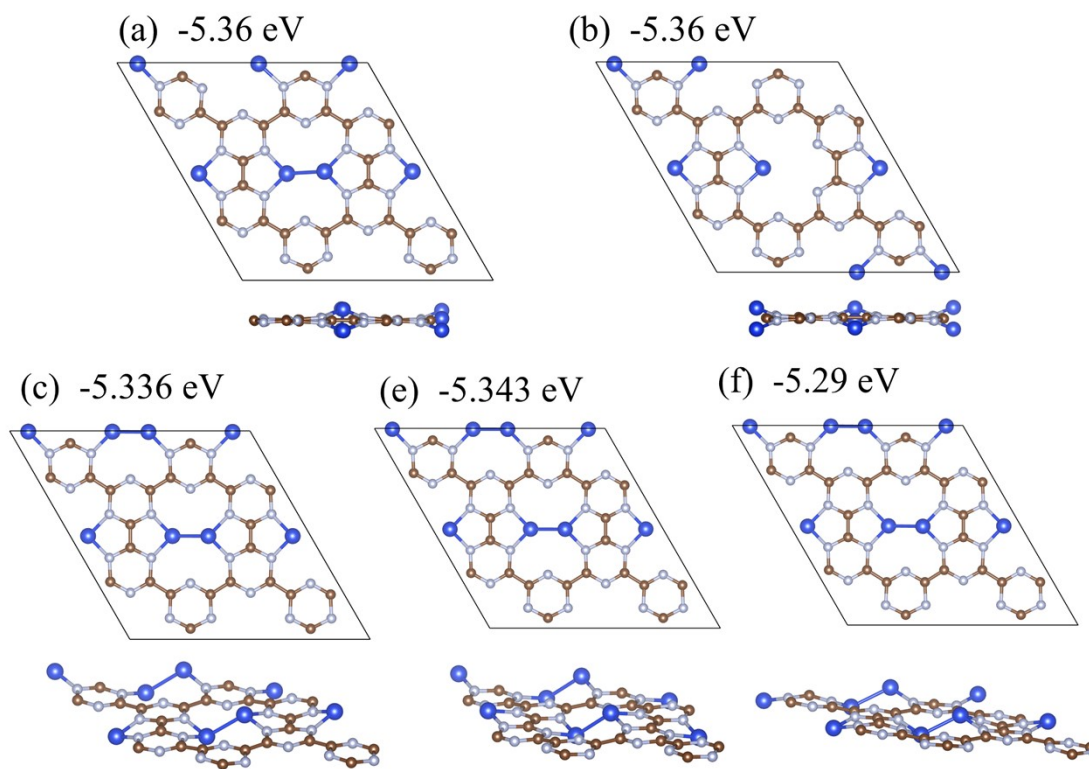

**Fig. S4** The highly symmetric configurations of (a-b)  $\text{Si}_7\text{C}_{24}\text{N}_{24}$  and (c-f)  $\text{SiC}_3\text{N}_3$  and their corresponding formation energies.

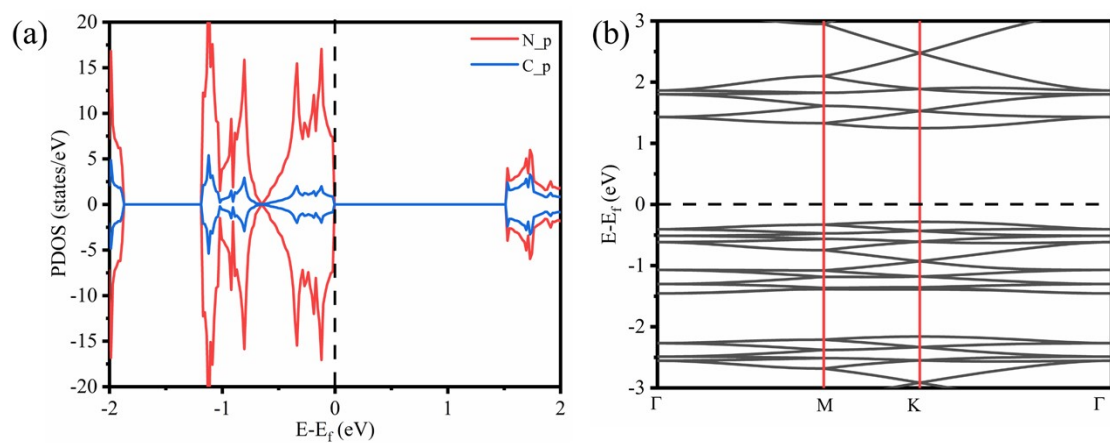

**Fig. S5** (a) Partial density of states and (b) energy bands of g-CN.

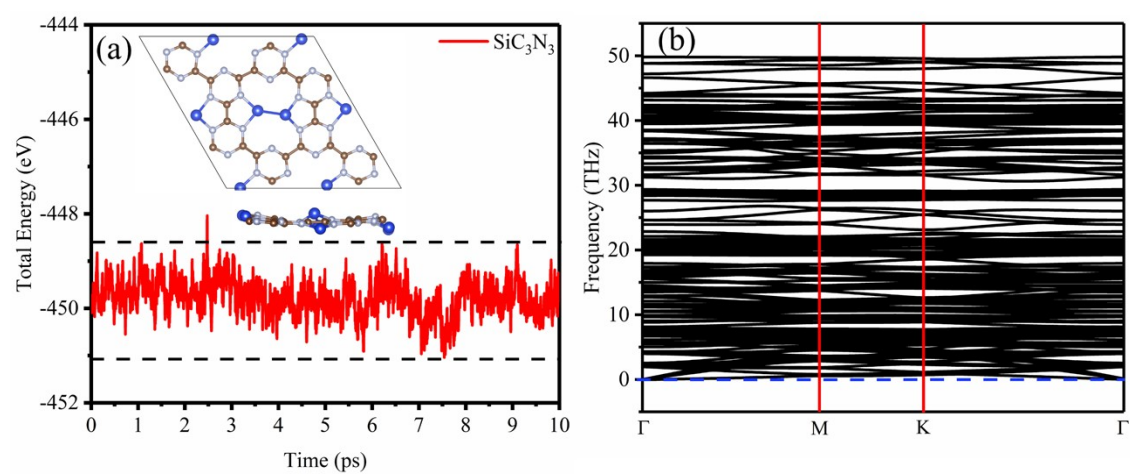

**Fig. S6** (a) The fluctuation of total-energies, top and side-snapshots of  $\text{SiC}_3\text{N}_3$  monolayer after AIMD simulation for 10 ps at 300 K. (b) Computed phonon dispersions of  $\text{SiC}_3\text{N}_3$ .

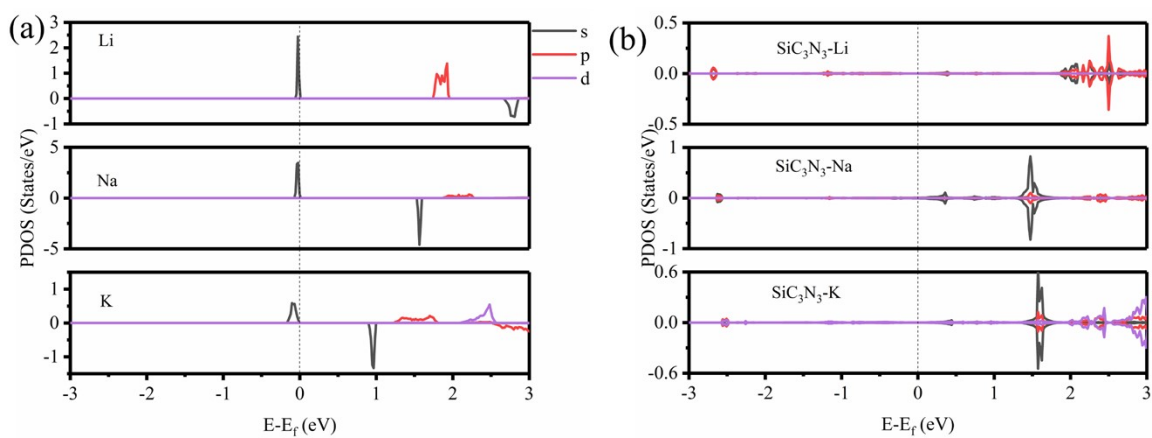

**Fig. S7** The partial density of states of isolated Li, Na, and K. (b) The partial density of states of one Li, Na, and K adsorbed on  $\text{SiC}_3\text{N}_3$ .

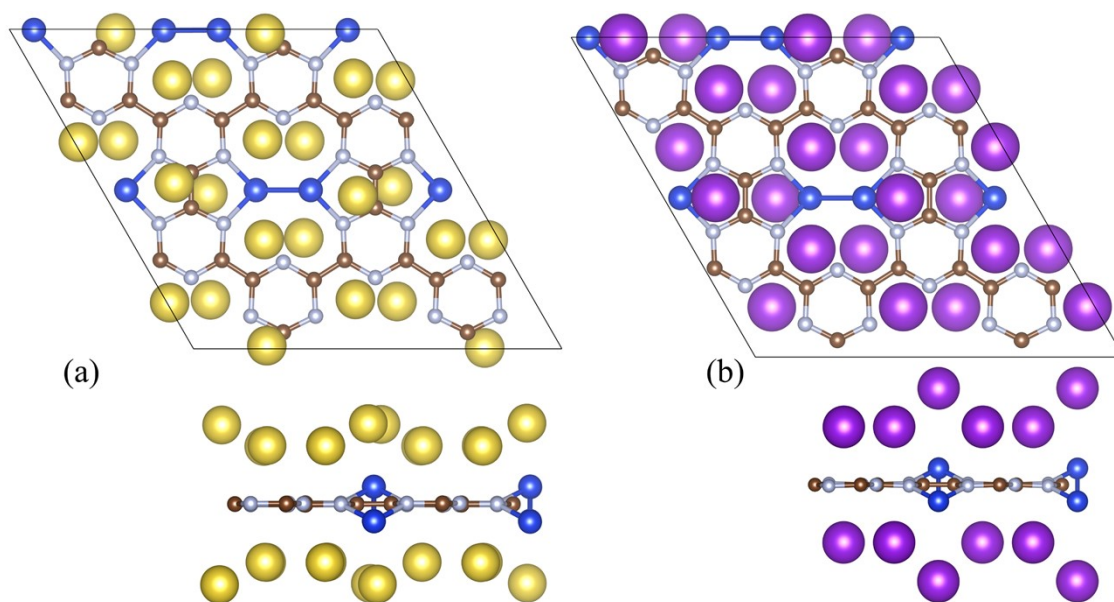

**Fig. S8** The most stable configurations of (a)  $\text{Na}_3\text{SiC}_3\text{N}_3$  and (b)  $\text{K}_3\text{C}_3\text{N}_3$ .

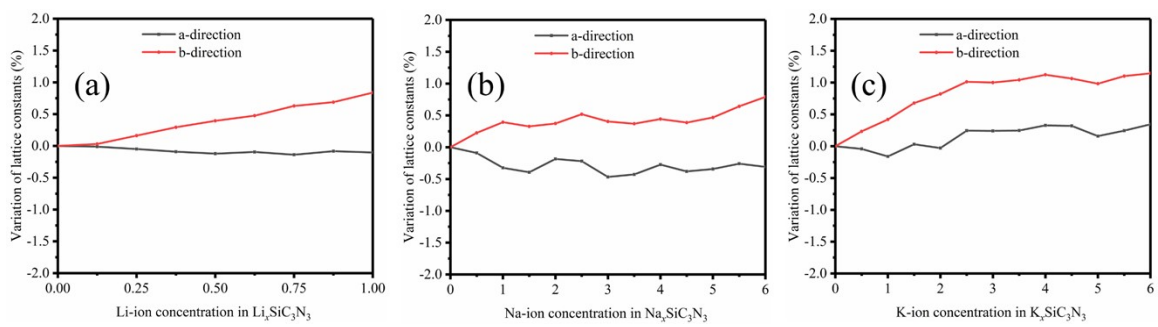

**Fig. S9** Variation of lattice constants at different (a) Li, (b) Na and (c) K adsorption concentrations.
